# Supplementary material
Source: PubMed Central journal article supplement (PMC7160848)
Supplement: ao9b03998_si_001.pdf [file ao9b03998_si_001.pdf]

# Supporting Information

## Mesoporous Octahedron-Shaped Tricobalt Tetraoxide Nanoparticles for Photocatalytic Degradation of Toxic Dyes

Vaishali N. Sonkusare<sup>a</sup>, Ratiram Gomaji Chaudhary<sup>b\*</sup>, Ganesh S. Bhusari<sup>c</sup>, Aniruddha Mondal<sup>d\*</sup>, Ajay K. Potbhare<sup>b</sup>, Raghvendra Kumar Mishra<sup>e</sup>, Harjeet D. Juneja<sup>a</sup>, and Ahmed A. Abdala<sup>f\*</sup>

<sup>a</sup>Post Graduate Teaching Department of Chemistry, Rashtrasant Tukdoji Maharaj Nagpur University (RTMNU), Nagpur-440033 (Maharashtra), India

<sup>b</sup>Post Graduate Department of Chemistry, Seth Kesarimal Porwal College of Arts, Science and Commerce, Kamptee-441001(Maharashtra), India

<sup>c</sup>Research and Development Division, Apple Chemie India Private Limited, Nagpur-441108, (Maharashtra), India

<sup>d</sup>Department of Chemical Engineering, Tatung University, Taipei 104, Taiwan, ROC

<sup>e</sup>IMEDA Materials, Technogetafe, Calle Eric Kandel, 2, 28906 Getafe, Madrid, Spain.

<sup>f</sup>Chemical Engineering Program, Texas A & M University at Qatar POB 23784, Doha, Qatar

\*Corresponding Authors: R. G. Chaudhary ([chaudhary\\_rati@yahoo.com](mailto:chaudhary_rati@yahoo.com)),  
Aniruddha Mondal ([aniruddhacsmeri@gmail.com](mailto:aniruddhacsmeri@gmail.com)),  
Ahmed A. Abdala ([ahmed.abdala@qatar.tamu.edu](mailto:ahmed.abdala@qatar.tamu.edu))

### Supplementary Data S1: Characterization of Co<sub>3</sub>O<sub>4</sub> NPs

X-ray diffraction (XRD) analysis was performed using Bruker AXS D8 Advance diffractometer in the 2 $\theta$  range of 2°-80° using Cu K $\alpha$  radiation ( $\lambda = 0.154$  nm). Fourier transform infrared (FT-IR) spectra were recorded in the range of 400–4000 cm<sup>-1</sup> at 4.0 cm<sup>-1</sup> resolution using Bruker (IFS 66v) spectrophotometer by the KBr pellets technique. UV–visible absorption spectra were recorded using Shimadzu-1800 UV–visible spectrophotometer (SL171 minispec). The qualitative elemental analysis was performed using energy dispersive spectroscopy (EDS) (Oxford Instrument, UK). The Brunauer–Emmett–Teller (BET) surface areas was obtained from nitrogen adsorption/desorption isotherms determined at liquid nitrogen temperature using Micromeritic (ASAP 2010) analyzer. The samples were out gassed for at 200 °C 2 hrs under vacuum prior to the adsorption/desorption measurements. Scanning electron microscopy (SEM) (JEOL, JSM-690LV) and transmission electron microscopy (TEM) (JEOL JEM 100SX) were used to analyze the

morphology, size and shape of the spinel  $\text{Co}_3\text{O}_4$ . Electrochemical calculations were directed using a three-electrode electrochemical cell entailing of a platinum (Pt) as the counter electrode, Ag/AgCl electrode as reference electrode, and a prepared electrode as the working electrode filled with an aqueous solution of 0.1 M  $\text{Na}_2\text{SO}_4$ . The electrolyte was soaked with nitrogen gas prior to electrochemical measurements. The photo electrochemical measurements were performed using a Biologic single channel potentiostat under illumination conditions ( $\lambda = 400$  nm). Irradiation was performed using a (400W) tungsten lamp as visible light source. The total organic carbon (TOC) analysis have been done via waste water method of this photo degradation methods. In this following total organic carbon study basically investigated the amount of organic carbon in the individual dye molecules have been done with Teledyne Tekmar TOC torch (USA). Standard solutions of dye molecule have been taken with potassium hydrogen phthalate (KHP) and distilled water. Prior sample analysis the instrument is calibrated. Liquid chromatography-mass spectrophotometer (LC-MS) (Shimadzu LCMS-8040) was used to investigate the structural elucidation and molecular fragmentation of toxic dyes with the following parameters: m/z 10 to 2000, scan speed 15000 u/sec, secondary electron multiplier.

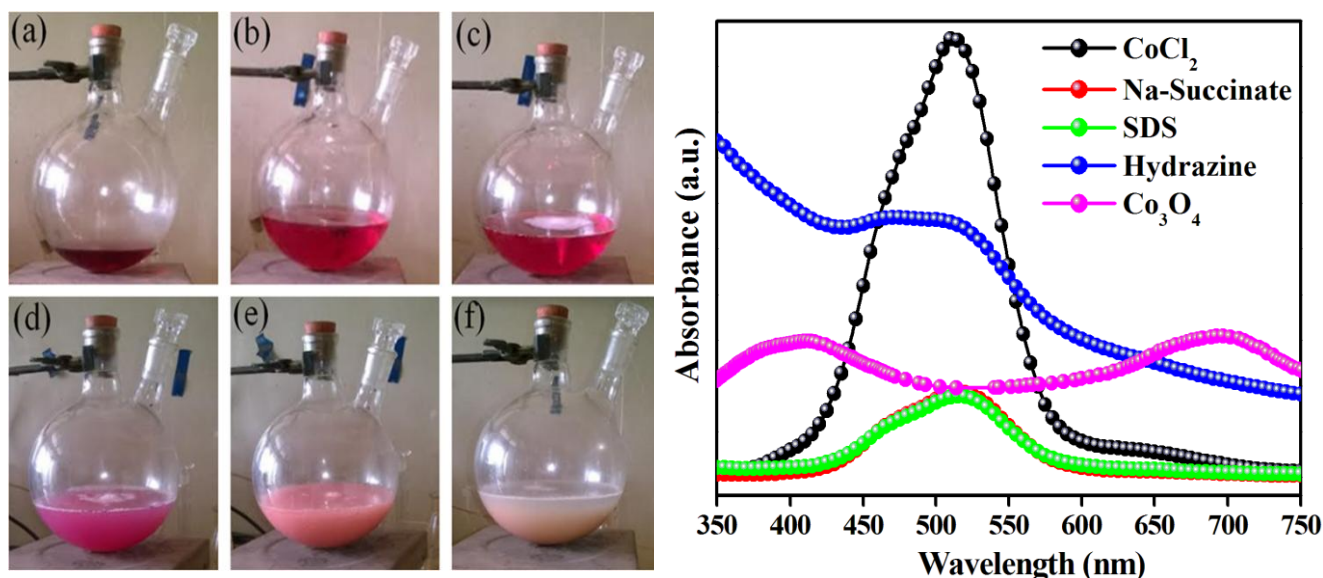

**Figure S1.** Different reaction step and their corresponding UV-Visible spectra follow the order such as (a)  $\text{CoCl}_2 \cdot x\text{H}_2\text{O}$  + SDS solution, (b)  $\text{CoCl}_2 \cdot x\text{H}_2\text{O}$  + SDS solution + sodium succinate solution, (c)  $\text{Co}_3\text{O}_4$ , (d)  $\text{CoCl}_2 \cdot x\text{H}_2\text{O}$  + sodium succinate solution + SDS + Hydrazine, and (e-f)  $\text{CoCl}_2 \cdot x\text{H}_2\text{O}$ .

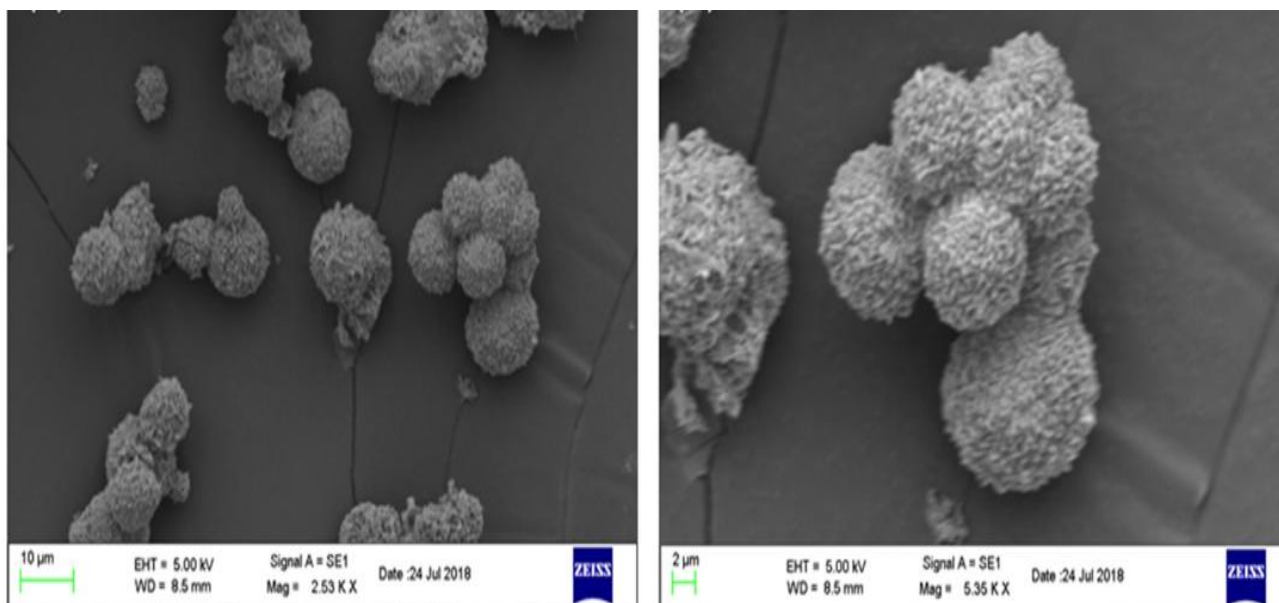

**Figure S2.** SEM images of before-calcined  $\text{Co}_3\text{O}_4$  NPs.

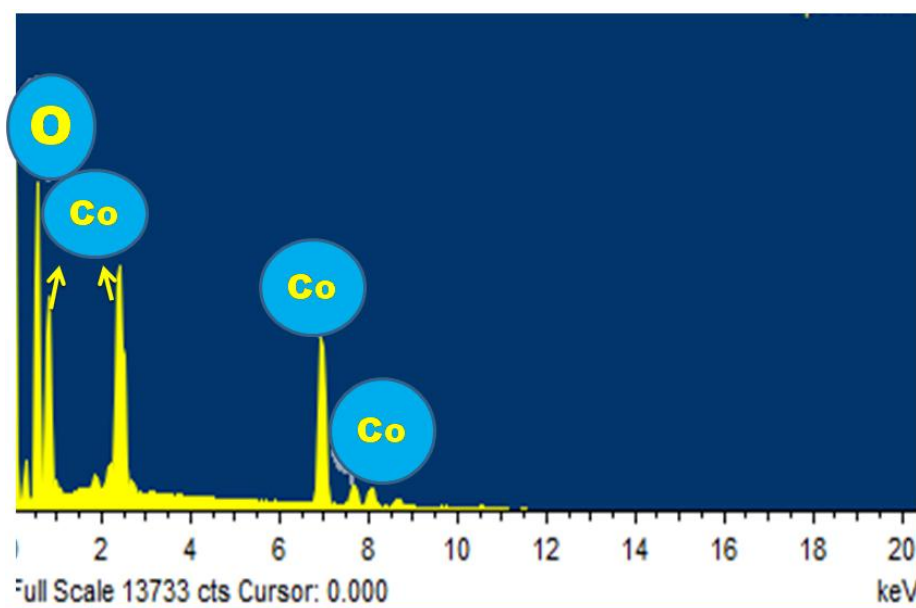

**Figure S3.**EDS spectrum of calcined- $\text{Co}_3\text{O}_4$ NPs.

### Supplementary Data S2: TG of pre-calcined $\text{Co}_3\text{O}_4$ NPs

As observed in [Fig. 2(a)] sequence of degradation of pre-calcined material takes place *via* multiple stages starting with dehydration of adsorbed water molecules followed by succinate organic fragments as proposed in Scheme. A well-defined thermograph with three-stage thermal decomposition process between 48-555°C, which resembles a standard sigmoid shape at initial stage, a significant mass loss of about 17.5% (Calc.18.0%) between 48-158°C with  $T_{HDT}$  peak at 118 °C attributed to removal of four moles of lattice water. The second stage decomposition lies between 160 and 325 °C with mass loss 9.0% (Calc. 9.02%) and  $T_{HDT}$  peak at 258 °C associated with the loss of two moles of coordinated water. In the third stage, a mass loss of about 41.98% (Calc. 41.13)

between 325 and 402 °C with  $T_{HDT}$  peak at 355 °C due to removal of coordinated succinate molecules was observed. This suggested pre-calcined material was complexing type. Eventually, stability achieved between 402-500 °C indicating formation of a stable  $\text{Co}_3\text{O}_4$  (Scheme S1). The half decomposition temperature (HDT), temperature range, and degraded materials at each step are provided in Table S1.

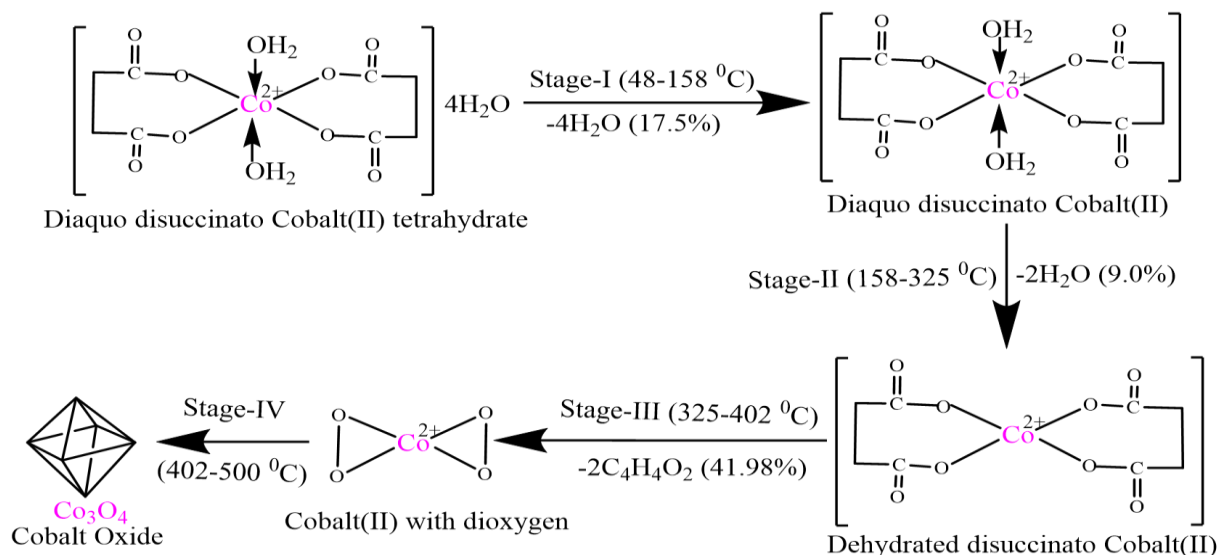

**Scheme S1.** Thermal degradation mechanism of SDS mediated pre-calcined  $\text{Co}_3\text{O}_4$  NPs.

**Table S1.** Thermal data of pre-calcined and calcined  $\text{Co}_3\text{O}_4$ .

| Material                             | Step            | HDT <sub>max</sub> | Temperature range (°C) | Weight loss (%) |       | Assignment degraded materials                                   |
|--------------------------------------|-----------------|--------------------|------------------------|-----------------|-------|-----------------------------------------------------------------|
|                                      |                 | $T_{HDT}$ (°C)     |                        | Obs             | Calc. |                                                                 |
| Pre-calcined $\text{Co}_3\text{O}_4$ | 1 <sup>st</sup> | 118                | 48-158                 | 17.5            | 18.0  | -4H <sub>2</sub> O (lattice water)                              |
|                                      | 2 <sup>nd</sup> | 258                | 160-325                | 9.02            | 9.02  | -2H <sub>2</sub> O (Coordinate water)                           |
|                                      | 3 <sup>rd</sup> | 355                | 326-402                | 41.98           | 41.13 | -2C <sub>4</sub> H <sub>4</sub> O <sub>2</sub> (Succinate ions) |
|                                      | 4 <sup>th</sup> | ----               | 402-500                | No loss         |       | Residue of $\text{Co}_3\text{O}_4$                              |
| Calcined $\text{Co}_3\text{O}_4$     | 1 <sup>st</sup> | 88                 | 48-120                 | 0.23            | 0.5   | -H <sub>2</sub> O (lattice water)                               |
|                                      | 2 <sup>nd</sup> | ----               | 120-798                | ----            |       | Material is stable ( $\text{Co}_3\text{O}_4$ )                  |
|                                      | 3 <sup>rd</sup> | 878                | 798-902                | 7.0             | 7.1   | -O <sub>2</sub> (Dioxygen)                                      |
|                                      | 4 <sup>th</sup> | ----               | 902-1000               | No loss         |       | Residue $\text{CoO} \cdot \text{Co}_3\text{O}_4$                |

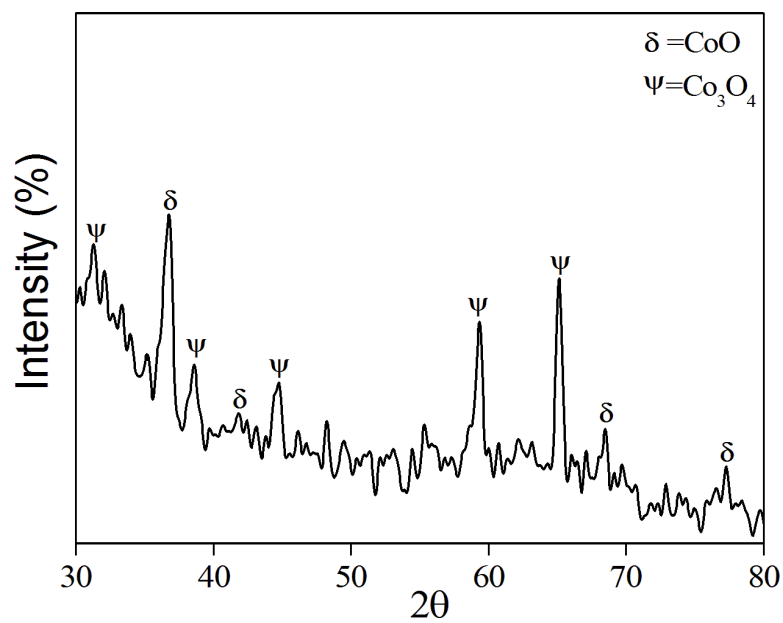

**Figure S4.** XRD profile of Mixed phase  $\text{CoO}.\text{Co}_3\text{O}_4$  after calcined material at  $900\text{ }^\circ\text{C}$

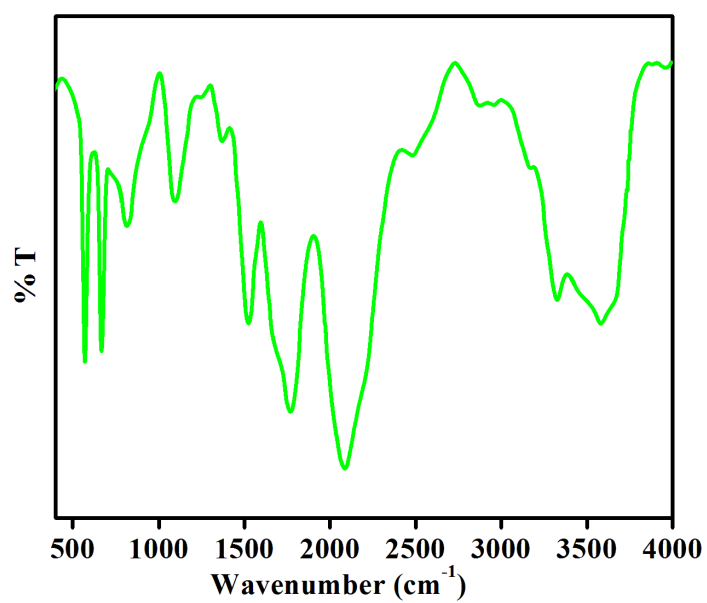

**Figure S5.** FT-IR spectra of  $\text{Co}_3\text{O}_4$  NPs

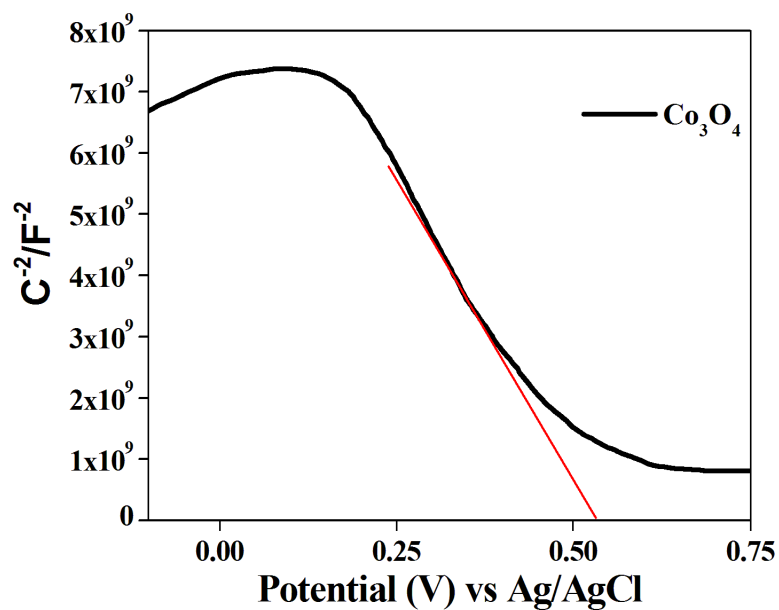

**Figure S6.** Mott-Schottky plot under light conditions of the synthesized  $\text{Co}_3\text{O}_4$

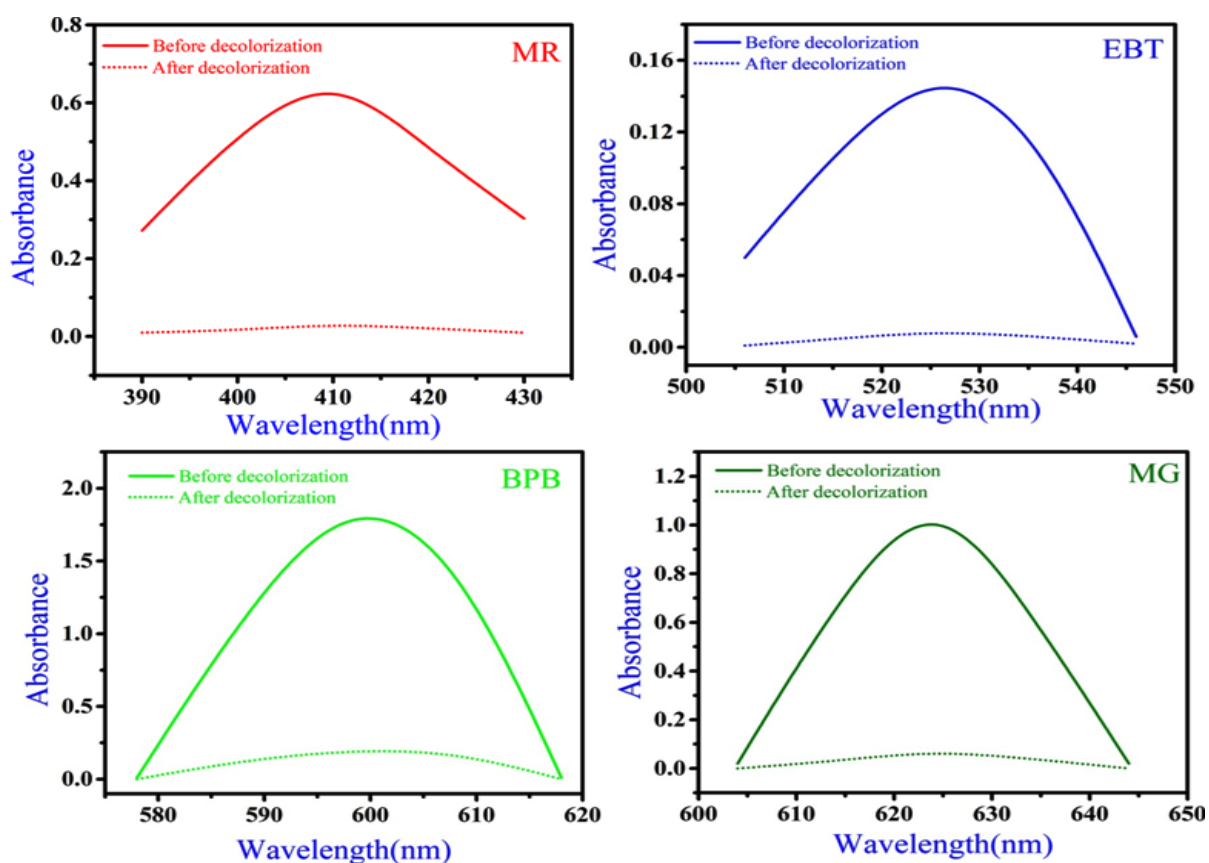

**Figure S7.** UV-visible spectra of dyes before and after treatment using  $\text{Co}_3\text{O}_4$  NPs

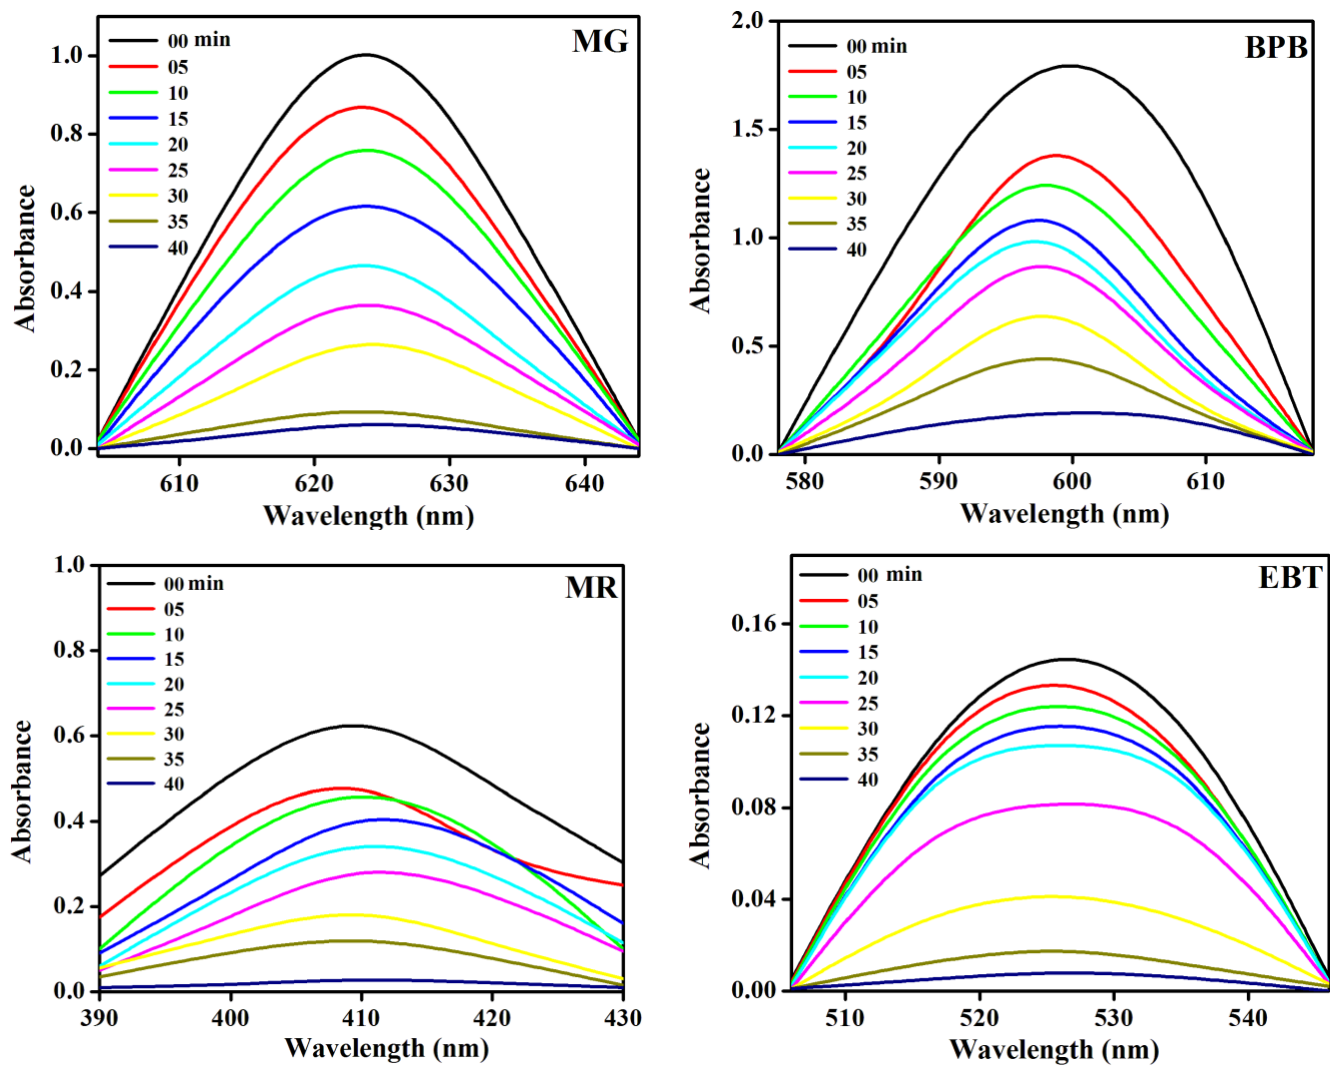

**Figure S8.** Changes in UV-Vis absorption pattern of degraded dyes with respect to irradiation time.



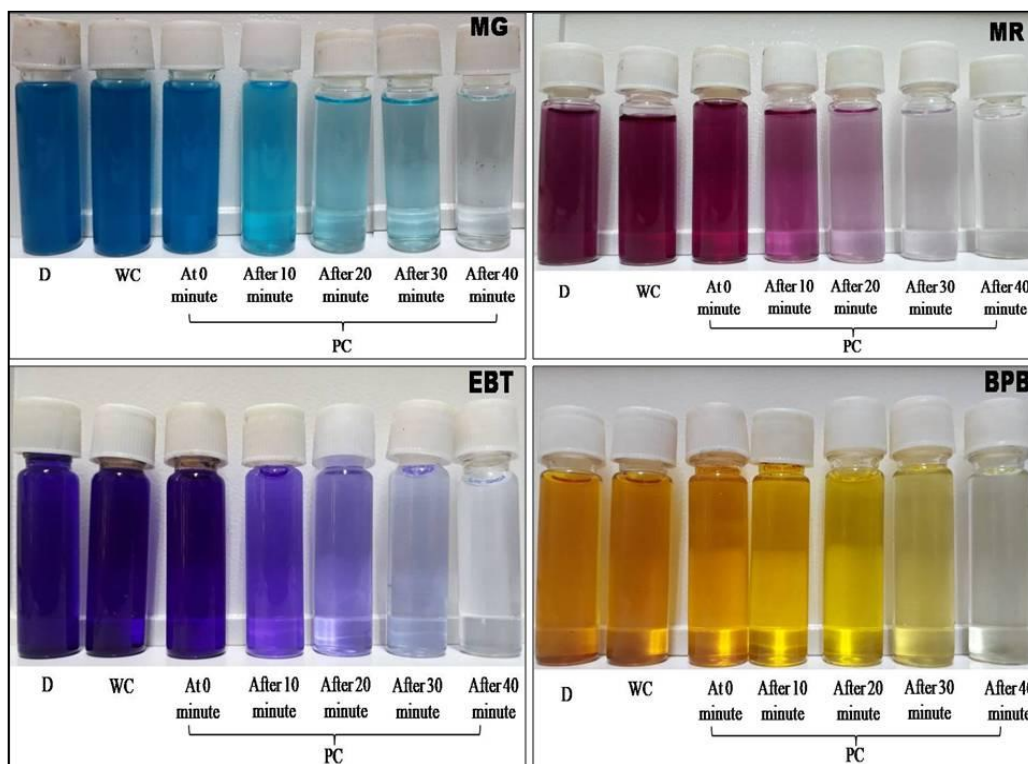

**Figure S9.** Photos of the corresponding dyes after degradation within 40 min using  $\text{Co}_3\text{O}_4\text{NPs}$ .

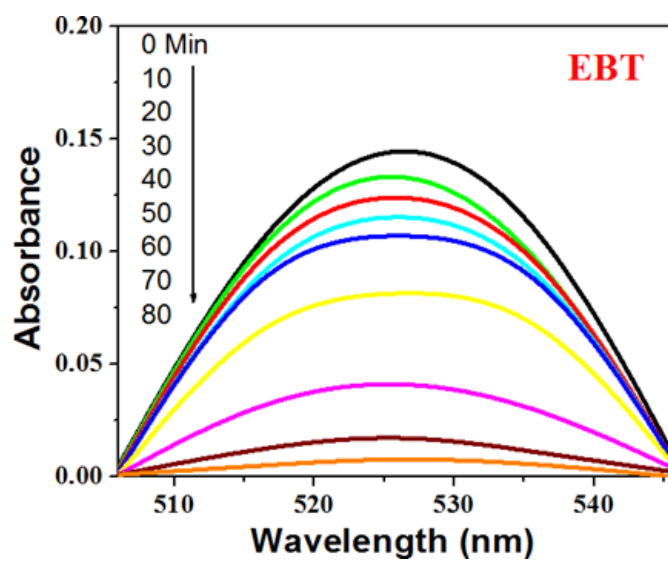

**Figure S10.** Photocatalytic degradation pattern of the industrially effluent waste product of the EBT



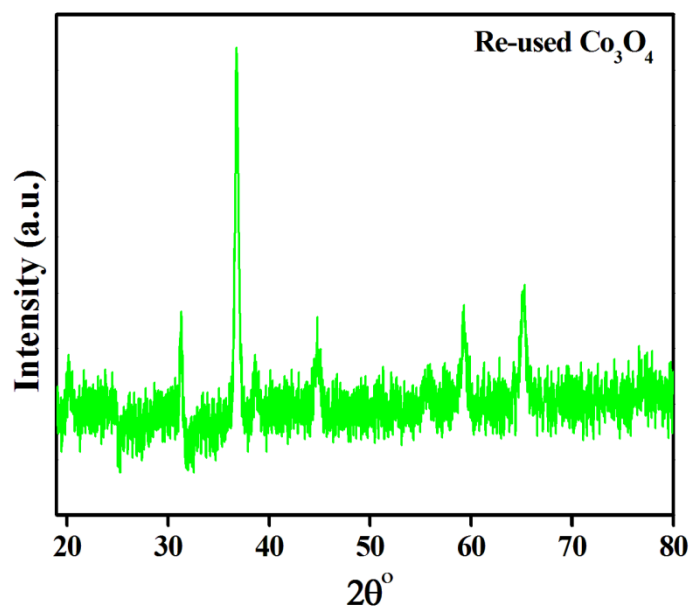

**Figure S11.** XRD pattern of re-used  $\text{Co}_3\text{O}_4$  after 4 cycle photo-catalysis reaction.

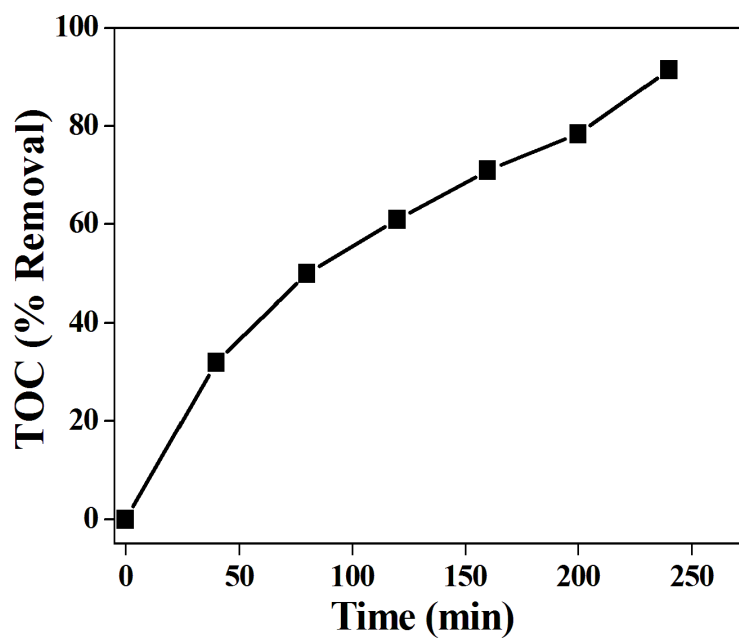

**Figure S12.** The TOC removal after 240 min

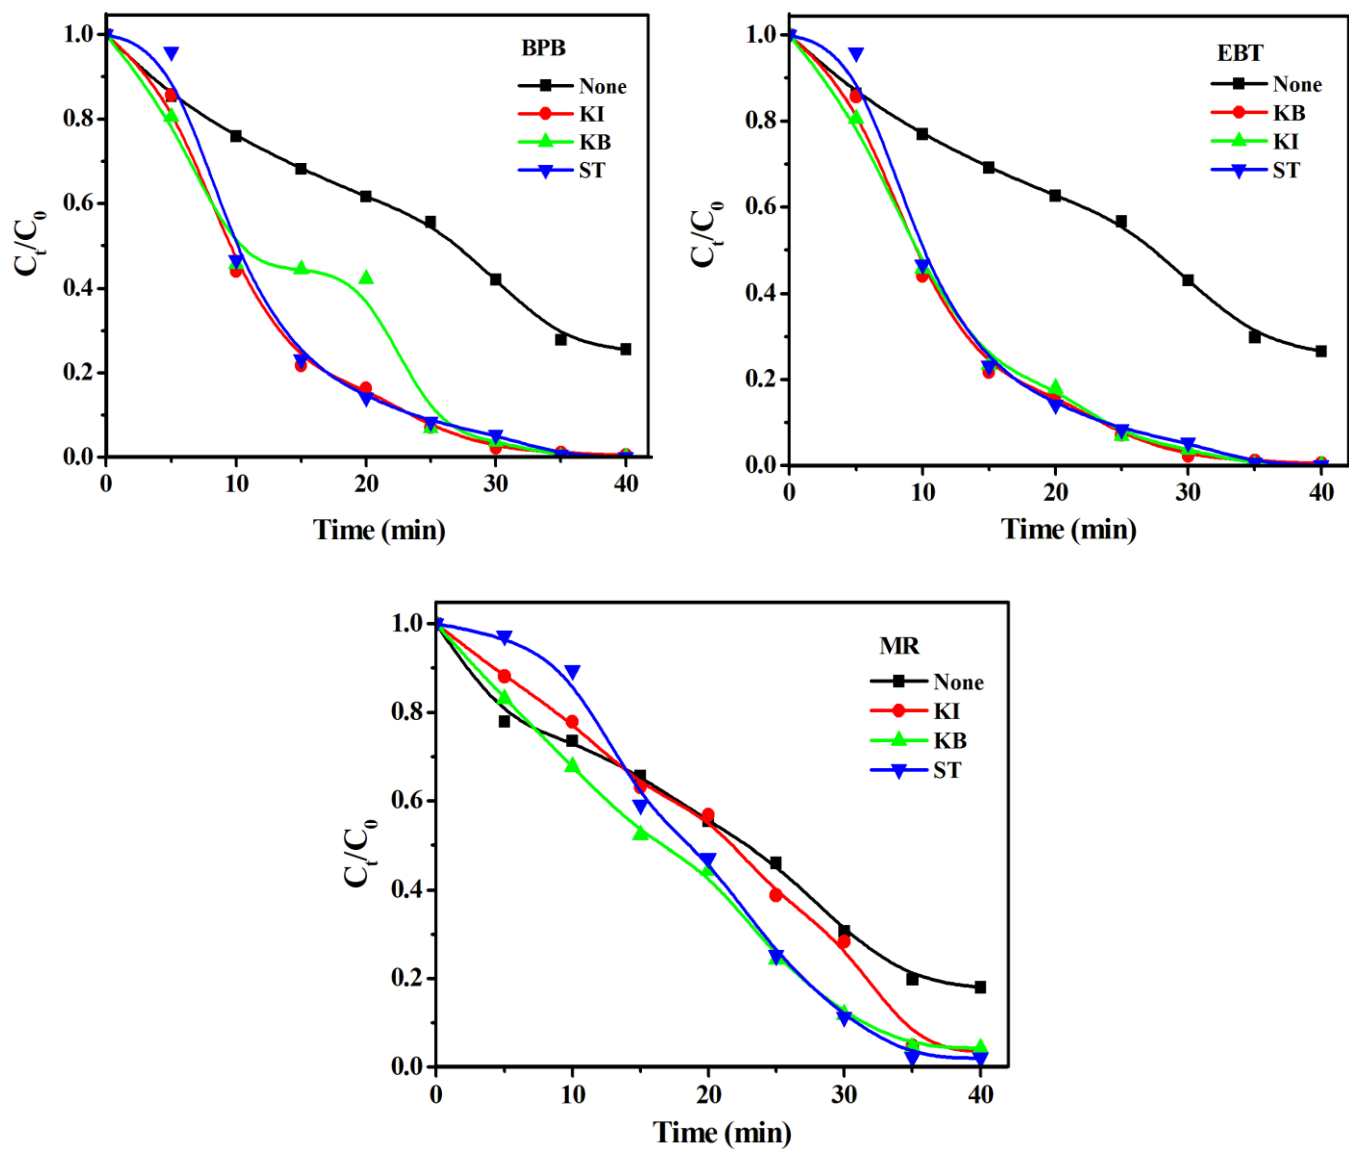

Figure S13. Scavenging test for BPB, EBT and MR using KB, KI and ST

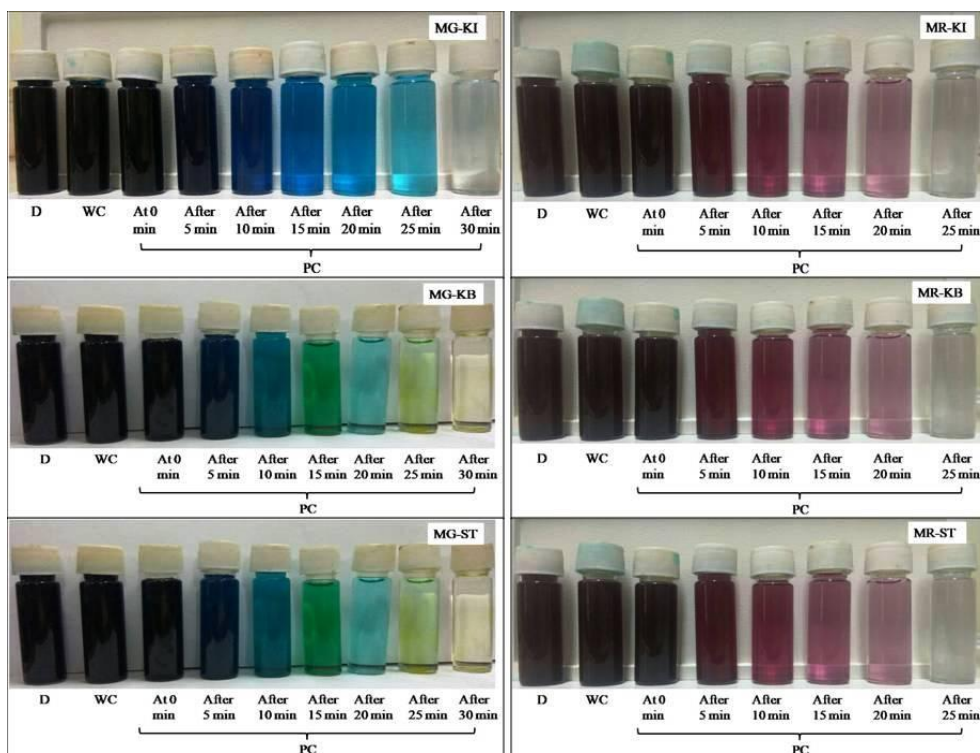

**Figure S14.** Photos of the corresponding dyes (MG and MR) in scavenging test using  $\text{Co}_3\text{O}_4$  NPs and scavenger

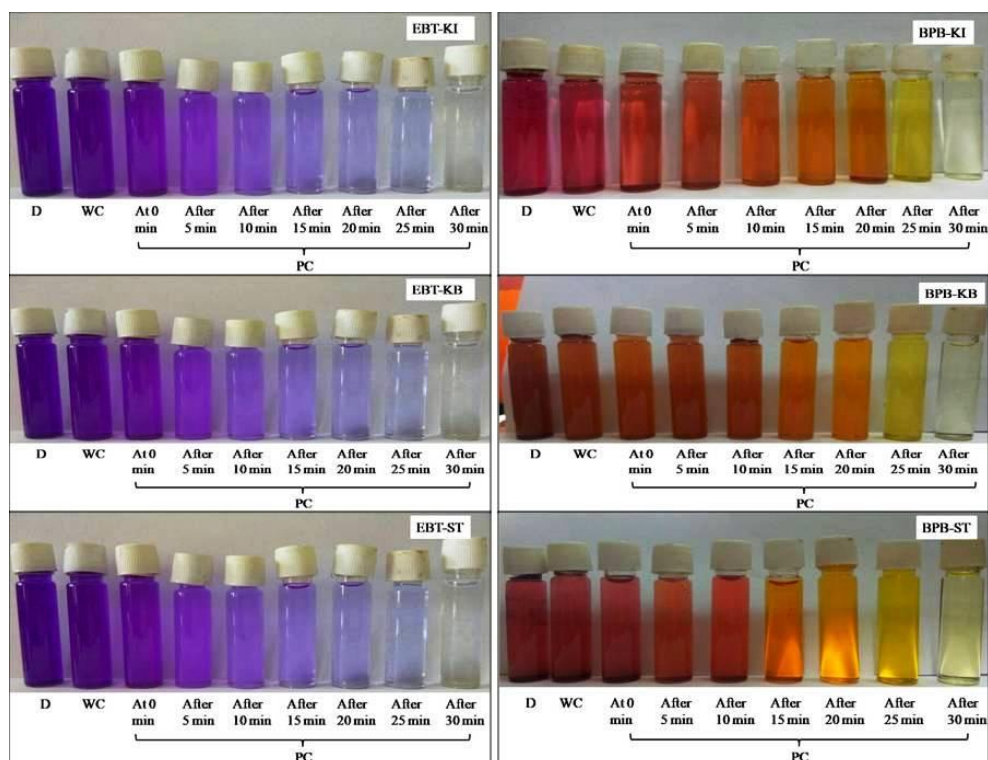

**Figure S15.** Photos of scavenging test for EBT and BPB using  $\text{Co}_3\text{O}_4$  NPs.
